# Supplementary material for: Unmodified Gum Arabic/Chitosan/Nanohydroxyapatite Nanocomposite Hydrogels as Potential Scaffolds for Bone Regeneration
Source: MDPI journal article supplement (doi:10.3390/polym14153052), 2022-07-28
Supplement: s1 [file s1]

## Supplementary Material

# Unmodified Gum Arabic/Chitosan/Nanohydroxyapatite Nanocomposite Hydrogels as Potential Scaffolds for Bone Regeneration

Lara E. Makar <sup>1,\*</sup>, Norhan Nady <sup>2,\*</sup>, Ahmed Abd El-Fattah <sup>1,3</sup>, Neivin Shawky <sup>4</sup> and Sherif H. Kandil <sup>1</sup>

<sup>1</sup> Department of Materials Science, Institute of Graduate Studies and Research, Alexandria University,  
El-Shatby, Alexandria 21526, Egypt; a\_abdelfattah@alexu.edu.eg (A.A.E.-F.);

s.kandil@usa.net (S.H.K.)

<sup>2</sup> Polymeric Materials Research Department, City of Scientific Research and Technological Applications (SRTA-City), Alexandria 21934, Egypt

<sup>3</sup> Department of Chemistry, College of Science, University of Bahrain, Sakhir P.O. Box 32038, Bahrain

<sup>4</sup> Oral and Maxillofacial Surgery Department, Faculty of Dentistry, Alexandria University, Champollion Street—Azarita, Alexandria 21526, Egypt; noovy60@hotmail.com

\* Correspondence: laramakar.dent@gmail.com or igsr.lara@alexu.edu.eg (L.E.M.); norhan.nady77@yahoo.com (N.N.); Tel.: +20-1227289592 (L.E.M.); +20-1090918521 (N.N.)

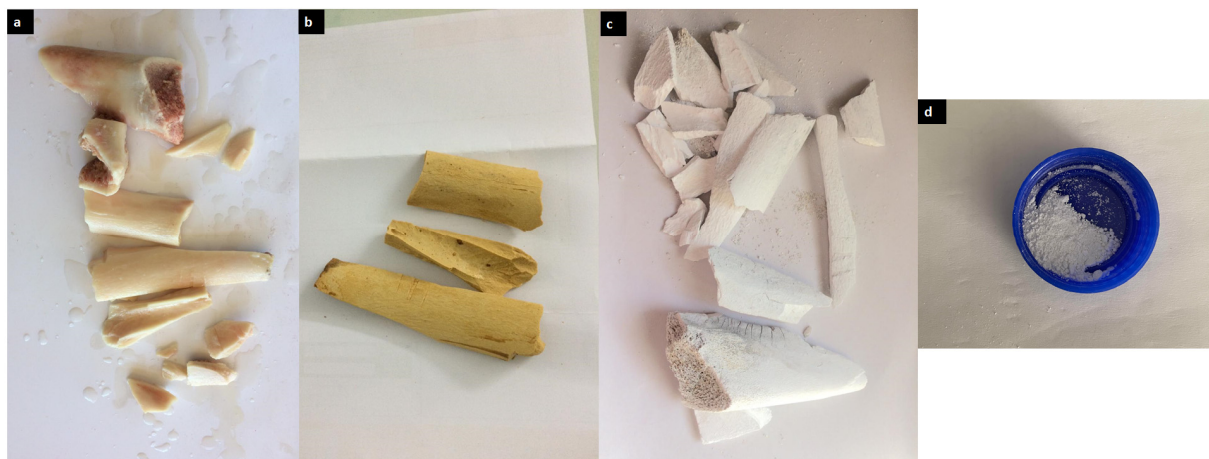

**Figure S1.** Preparation steps for nanohydroxyapatite (nHA). (a). The bovine bone was washed carefully with water and acetone to remove the fats and other impurities. (b). The bone was dried at 160 °C for 48 h. (c). The bones were annealed in an electric furnace at 750°C for 6. (d). the bone was ground with mortar and pestle to a particle size less than 450 µm

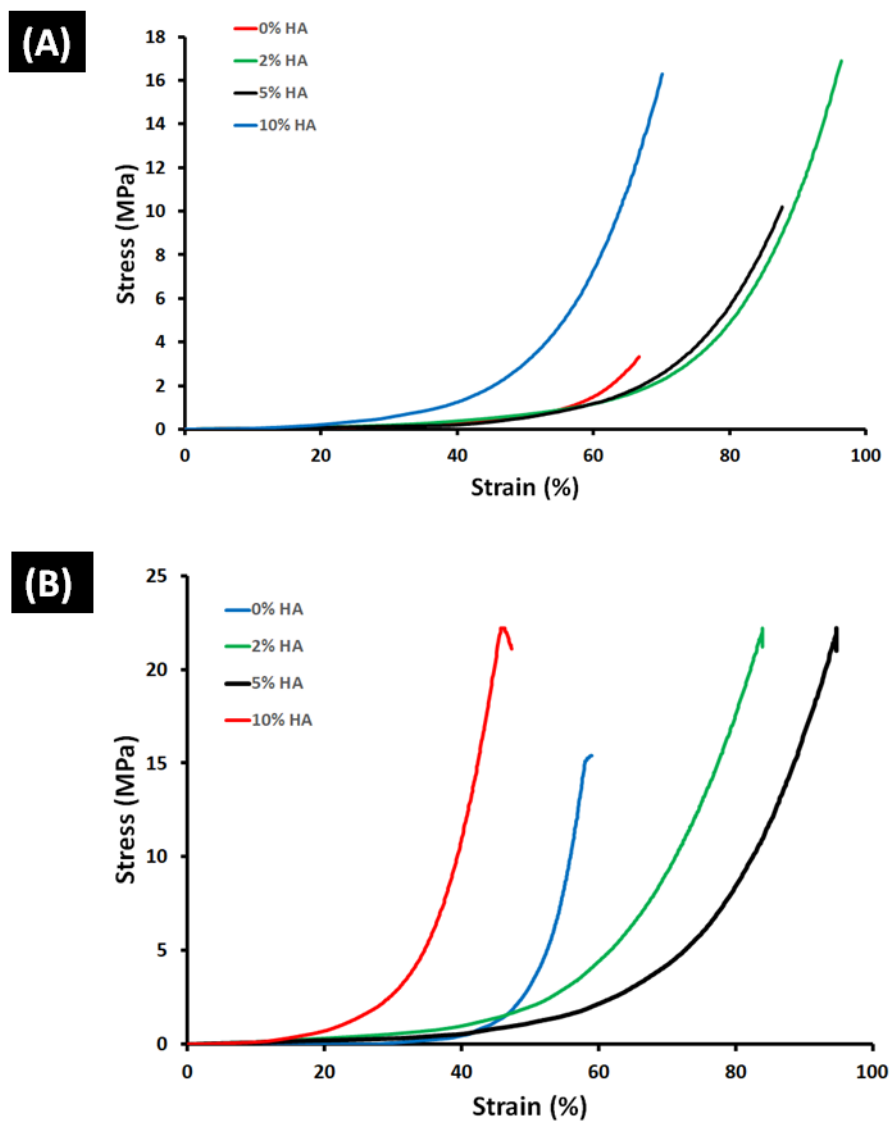

**Figure S2.** Stress-strain compressive strength curves of prepared hydrogels: (A) GA/chitosan (15%), and (B) GA/chitosan (25%), with different nHA contents (0, 2, 5, and 10%, respectively).
